# Supplementary material for: A photolithography tailored undulating configuration to confine nanostructures on microtubes via a “stress-induced” effect for boosting sodium ion storage
Source: Royal Society of Chemistry journal article supplement (doi:10.1039/d2tc02151j), 2022-01-01
Supplement: d2tc02151j1.pdf [file d2tc02151j1.pdf]

## Supporting Information

### Photolithography tailored undulating configuration to confine nanostructures on microtubes via “stress-induced” effect for boosting sodium ion storage

| Dose/kGy | Degree of cellulose polymerisation | X-Ray Crystallographic Index/% | Carbonyl content /(mol/kg) | Carboxyl content /(mol/kg) |
|----------|------------------------------------|--------------------------------|----------------------------|----------------------------|
| 0.0      | 4400                               | 76                             | 0.00                       | 0.002                      |
| 0.83     | 3100                               | -                              | 0.01                       | 0.002                      |
| 8.3      | 880                                | 75                             | 0.05                       | 0.005                      |
| 42       | 320                                | -                              | 0.22                       | 0.015                      |
| 83       | 210                                | 77                             | 0.36                       | 0.023                      |
| 417      | 79                                 | -                              | 1.30                       | 0.070                      |
| 833      | 56                                 | 77                             | 2.66                       | 0.139                      |

**Table S1** Effect of gamma irradiation on the physical and chemical properties of cellulose

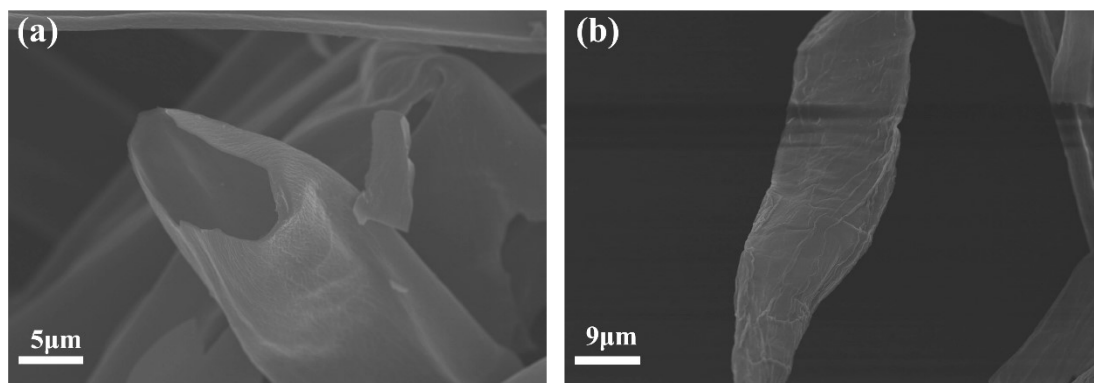

**Figure S1.** SEM images of the morphologies of a)  $\gamma$ -30 fiber, b)  $\gamma$ -100 fiber.

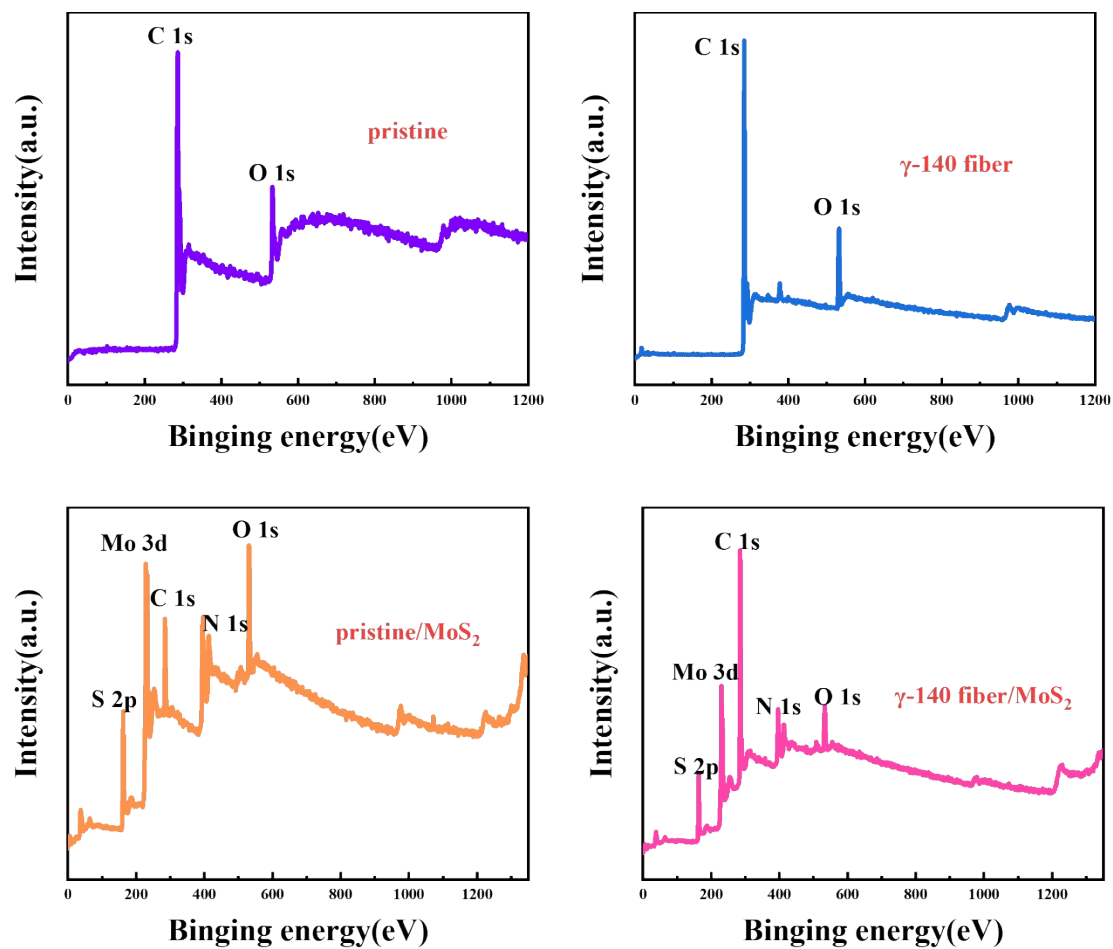

Figure S2. The XPS survey spectra.

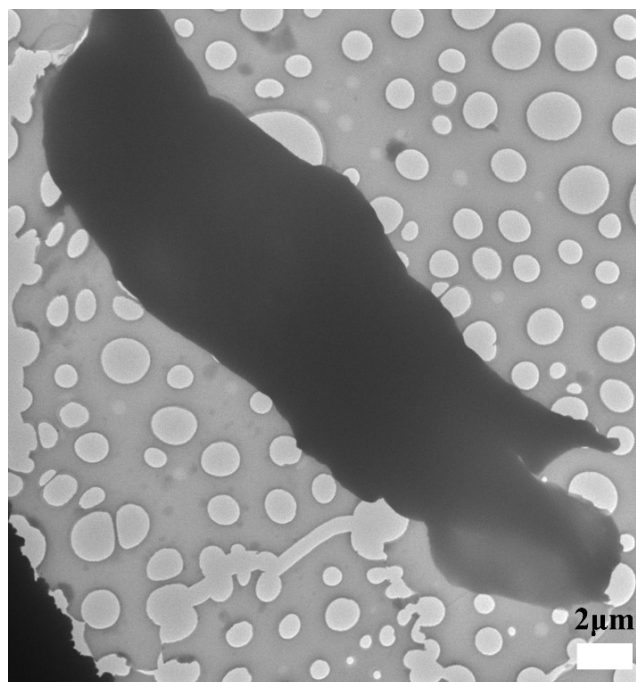

Figure S3. TEM image of γ-kapok fiber.

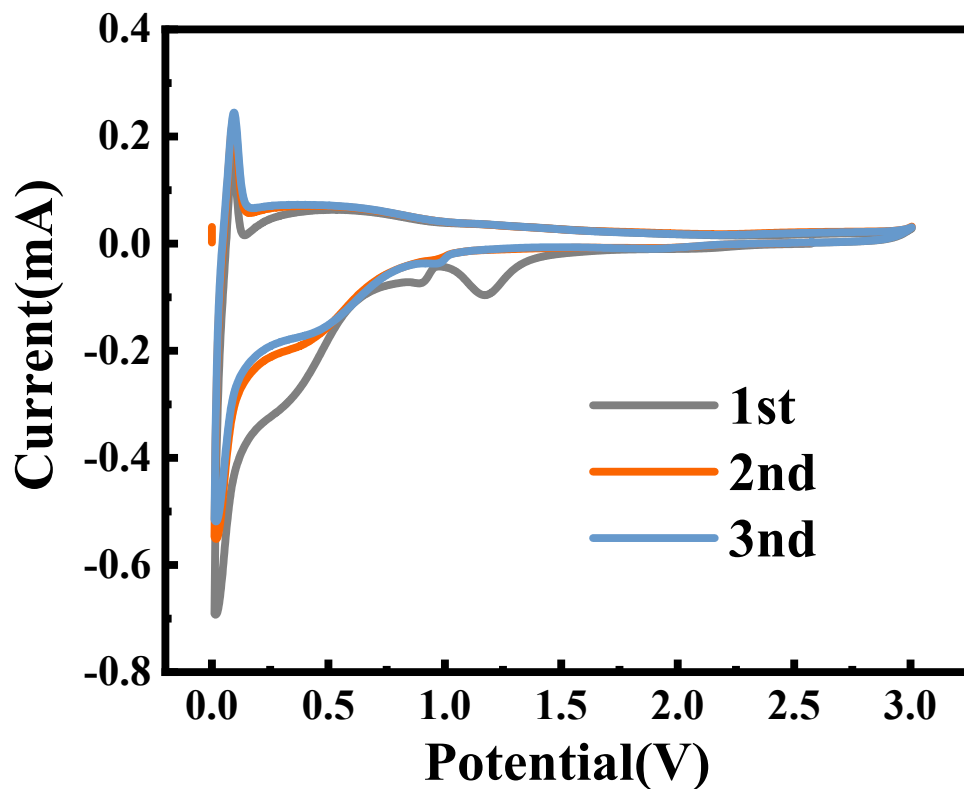

Figure S4. CV curves of pristine fiber/MoS<sub>2</sub>

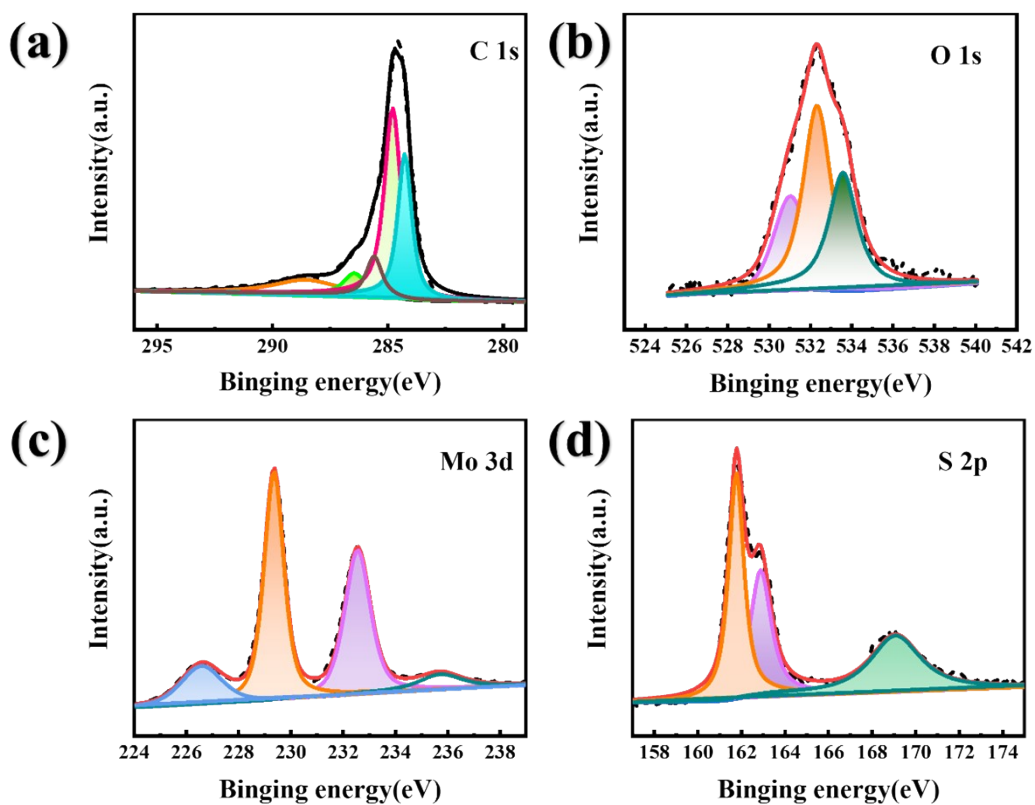

Figure S5. The XPS spectra of  $\gamma$ -140 fiber/MoS<sub>2</sub>

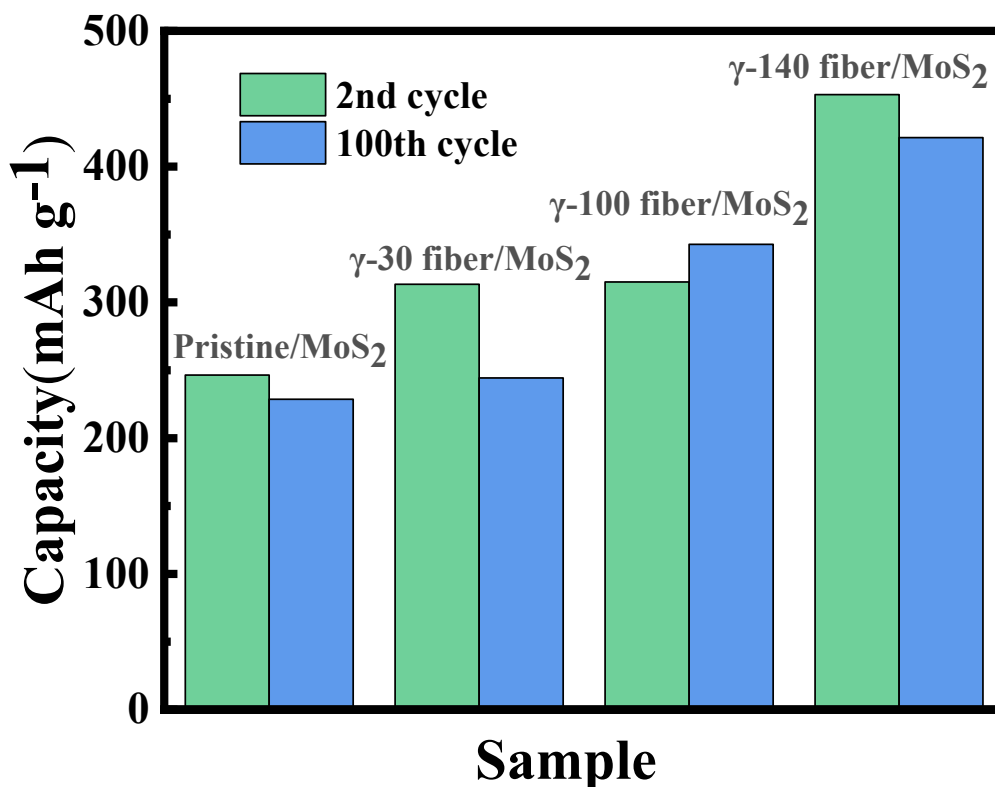

Figure S6. The reversible capacity of the three electrodes at 100th cycle compared to 2nd cycle.

| Materials                       | Capacity (mAh g <sup>-1</sup> )                  | Current (A g <sup>-1</sup> )   | Ref . | Capacity (mAh g <sup>-1</sup> ) | Cycles | Current (A g <sup>-1</sup> ) |
|---------------------------------|--------------------------------------------------|--------------------------------|-------|---------------------------------|--------|------------------------------|
| Co-doped 1T-MoS <sub>2</sub>    | 59.4,422.8,390.4, 360.1,319.1,282.2, 238.2,235.9 | 0.2,0.5,1,2, 5,10,20,25        | 1     | 218.6                           | 8,240  | 5                            |
| Few-layer MoS <sub>2</sub>      | 430,23,413,398, 374                              | 0.1,0.2,0.5,1,2                | 2     | 390                             | 300    | 1                            |
| MoS <sub>2</sub> /C composites  | 320,21,0.1                                       | 0.1,1,0,2.0                    | 3     | 256                             | 200    | 1                            |
| Petal-like MoS <sub>2</sub>     | 853,788,728,530, 399,229                         | 0.1,0.5,1,2,5,1 0              | 4     | 624                             | 400    | 5                            |
| Mesoporous MoS <sub>2</sub> /C  | 481,456,406391, 339,312,244                      | 0.1,0.3,0.5,1.0, 5.0,10.0,20.0 | 5     | 390                             | 2500   | 1                            |
| MoS <sub>2</sub> @ Carbon Tubes | 520,470,400,350, 300,210,190                     | 0.1,0.2,0.5,1,2, 5,10          | 6     | 300                             | 1000   | 2                            |

|                                                      |                                             |                             |    |       |     |      |
|------------------------------------------------------|---------------------------------------------|-----------------------------|----|-------|-----|------|
| SMS@C                                                | 568.4,513.3,472.2<br>,422.4,320.9,303.<br>4 | 0.1,0.2,0.5,1,2,<br>5,10    | 7  | 465.6 | 100 | 1    |
| MoS <sub>2</sub> -N,P-Co-doped                       | 413,393,366,301,<br>261,226                 | 0.05,0.1,0.2,<br>0.5,1,2    | 8  | 13    | 500 | 5    |
| MoS <sub>2</sub> coated on carbon fibers             | 288,268,241,225                             | 0.2,0.3,0.5,1               | 9  | 60    | 280 | 1    |
| MoS <sub>2</sub> /C Hierarchical Tubular             | 563.5,520.5,489.4<br>,452.9,425.1,401.<br>3 | 0.2,0.5,1.0,2.0,<br>5.0,10  | 10 | 484.9 | 100 | 2    |
| MoS <sub>2</sub> -3D interconnected carbon nanofiber | 500,488,440,410,<br>360,285,210             | 0.1,0.2,0.5,1,2,<br>5,10,20 | 11 | 260   | 250 | 0.05 |
| MoS <sub>2</sub> /carbon microspheres                | 412,390,349,318,<br>285,232,143             | 0.1,0.2,0.5,1,2,<br>4,5     | 12 | 346   | 280 | 1    |

**Table S2** Comparison of the electrochemical performance of anodes in this work with previously reported sodium ion battery anodes.

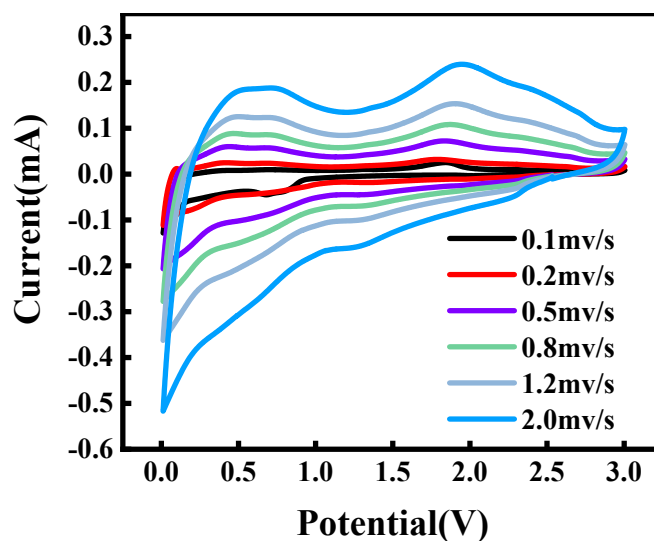

**Figure S7.** CV curves of  $\gamma$ -140 fiber at stepwise scan rates from 0.1 to 2.0  $\text{mV s}^{-1}$

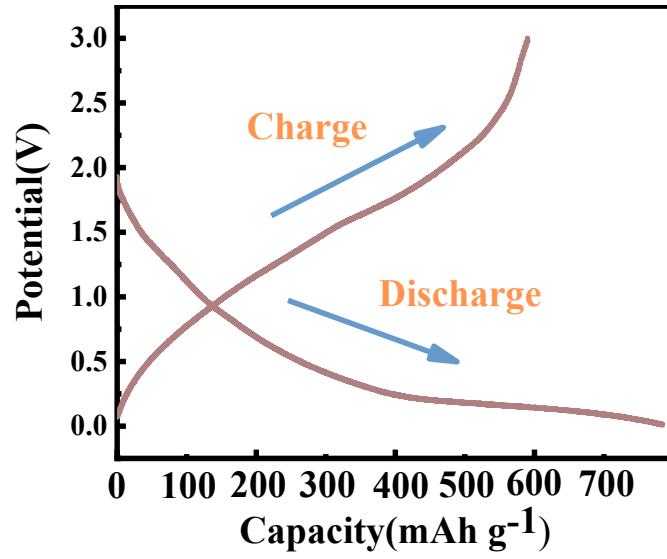

Figure S8. Charge-discharge profiles of  $\gamma$ -140 fiber

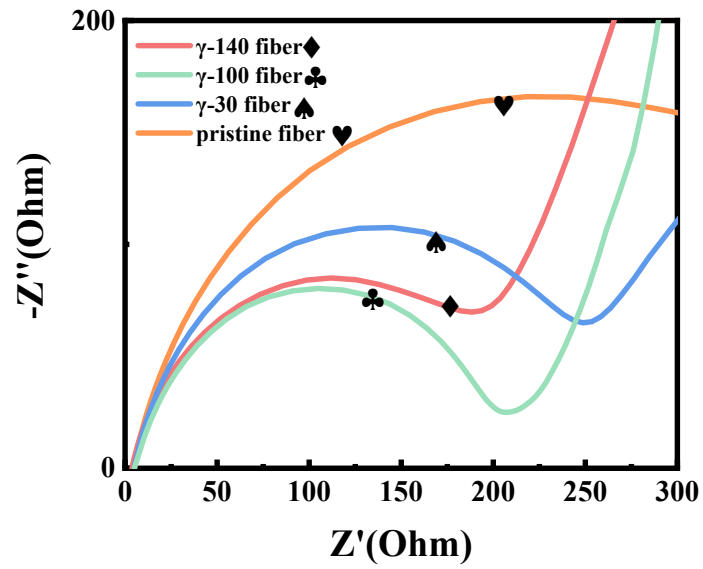

Figure S9. Details of the Nyquist plots

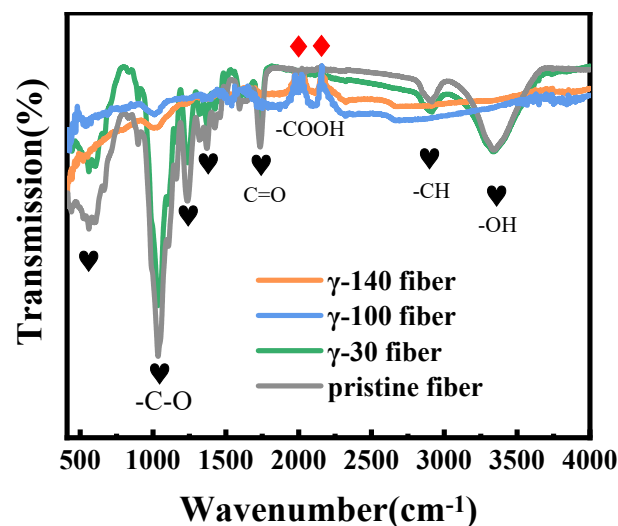

Figure S10. Details of the FTIR spectra

## References

- (1) Li, P.; Yang, Y.; Gong, S.; Lv, F.; Wang, W.; Li, Y.; Luo, M.; Xing, Y.; Wang, Q.; Guo, S., Co-doped 1T-MoS<sub>2</sub> nanosheets embedded in N, S-doped carbon nanobowls for high-rate and ultra-stable sodium-ion batteries. *Nano Research* **2019**, *12* (9), 2218-2223.
- (2) Cheng, A.; Zhang, H.; Zhong, W.; Li, Z.; Cheng, D.; Lin, Y.; Tang, Y.; Shao, H.; Li, Z., Few-layer MoS<sub>2</sub> embedded in N-doped carbon fibers with interconnected macropores for ultrafast sodium storage. *Carbon* **2020**, *168*, 691-700.
- (3) Wang, Y.; Yang, Y.; Zhang, D.; Wang, Y.; Luo, X.; Liu, X.; Kim, J. K.; Luo, Y., Inter-overlapped MoS<sub>2</sub>/C composites with large-interlayer-spacing for high-performance sodium-ion batteries. *Nanoscale Horiz* **2020**, *5* (7), 1127-1135.
- (4) Zhang, X.; Zhao, R.; Wu, Q.; Li, W.; Shen, C.; Ni, L.; Yan, H.; Diao, G.; Chen, M., Petal-like MoS<sub>2</sub> Nanosheets Space-Confined in Hollow Mesoporous Carbon Spheres for Enhanced Lithium Storage Performance. *ACS Nano* **2017**, *11* (8), 8429-8436.
- (5) Lu, Y.; Zhao, Q.; Zhang, N.; Lei, K.; Li, F.; Chen, J., Facile Spraying Synthesis and High-Performance Sodium Storage of Mesoporous MoS<sub>2</sub>/C Microspheres. *Adv Funct Mater* **2016**, *26* (6), 911-918.
- (6) Zhang, Y.; Liu, W.; Wang, T.; Du, Y.; Cui, Y.; Liu, S.; Wang, H.; Liu, S.; Chen, M.; Zhou, J., Space-Confined Fabrication of MoS<sub>2</sub>@Carbon Tubes with Semienclosed Architecture Achieving Superior Cycling Capability for Sodium Ion Storage. *Advanced Materials Interfaces* **2020**, *7* (21), 2000953.
- (7) Wang, D.; Cao, L.; Luo, D.; Gao, R.; Li, H.; Wang, D.; Sun, G.; Zhao, Z.; Li, N.; Zhang, Y., Chain Mail Heterostructured Hydrangea-like Binary Metal Sulfides for High Efficiency Sodium Ion Battery. *Nano Energy* **2021**, 106185.
- (8) Luo, F.; Xia, X.; Zeng, L.; Chen, X.; Feng, X.; Wang, J.; Xu, L.; Qian, Q.; Wei, M.; Chen, Q., A composite of ultra-fine few-layer MoS<sub>2</sub> structures embedded on N,P-co-doped bio-carbon for high-performance sodium-ion batteries. *New J Chem* **2020**, *44* (5), 2046-2052.
- (9) Zhang, Y.; Tao, H.; Li, T.; Du, S.; Li, J.; Zhang, Y.; Yang, X., Vertically oxygen-incorporated MoS<sub>2</sub> nanosheets coated on carbon fibers for sodium-ion batteries. *ACS Applied Materials & Interfaces*

**2018**, *10* (41), 35206-35215.

(10) Pan, Q.; Zhang, Q.; Zheng, F.; Liu, Y.; Li, Y.; Ou, X.; Xiong, X.; Yang, C.; Liu, M., Construction of MoS<sub>2</sub>/C Hierarchical Tubular Heterostructures for High-Performance Sodium Ion Batteries. *Acs Nano* **2018**, *12* (12), 12578-12586.

(11) Yang, H.; Wang, M.; Liu, X.; Jiang, Y.; Yu, Y., MoS<sub>2</sub> embedded in 3D interconnected carbon nanofiber film as a free-standing anode for sodium-ion batteries. *Nano Research* **2018**, *11* (7), 3844-3853.

(12) Wu, J.; Lu, Z.; Li, K.; Cui, J.; Yao, S.; Haq, M. I.-u.; Li, B.; Yang, Q.-H.; Kang, F.; Ciucci, F., Hierarchical MoS<sub>2</sub>/carbon microspheres as long-life and high-rate anodes for sodium-ion batteries. *Journal Of Materials Chemistry A* **2018**, *6* (14), 5668-5677.
